# Supplementary material for: Benign synthesis of ceria hollow nanocrystals by a template-free method
Source: Royal Society of Chemistry journal article supplement (doi:10.1039/c0ce00758g), 2011-01-01
Supplement: c0ce00758g.pdf [file c0ce00758g.pdf]

**Electronic supplementary information for**

**Benign Synthesis of Ceria Hollow Nanocrystals through  
Template-free Method**

Guozhu Chen,<sup>a</sup> Fenfen Zhu,<sup>a</sup> Xuan Sun,<sup>\*a</sup> Sixiu Sun<sup>a</sup> and Ruiping Chen<sup>b</sup>

*a Key laboratory of Colloid and Interface Chemistry, Ministry of Education, School of Chemistry and Chemical Engineering, Shandong University, Jinan 250100, P. R. China.*

*b State Key Lab of Structural Chemistry, Fujian Institute of Research on the Structure of Matter, Chinese Academy of Sciences, Fuzhou 350002, P. R. China*

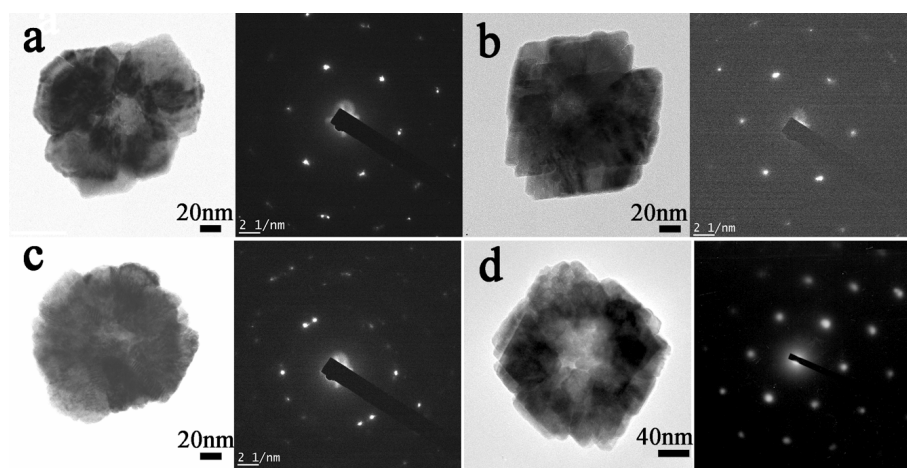

**Fig. S1** TEM images and corresponding SAED patterns of different individual hollow nanocrystals prepared from the conditions: the  $\text{CeCl}_3$  was the cerium precursor and the volume ratio between water and ethanol was 3:1 in the mixed

solvent at 160 °C for 24h.

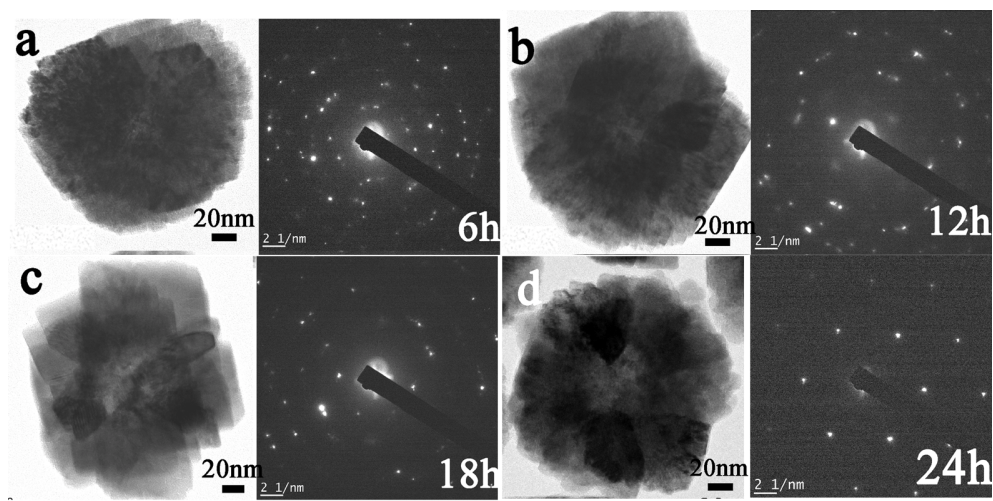

**Fig. S2** TEM images and corresponding SAED patterns of individual nanocrystal obtained at 160°C at different reaction times: (a) 6h; (b) 12 h; (c) 18 h; (d) 24h when the CeCl<sub>3</sub> was the cerium precursor and the volume ratio between water and ethanol was 3:1 in the mixed solvent.

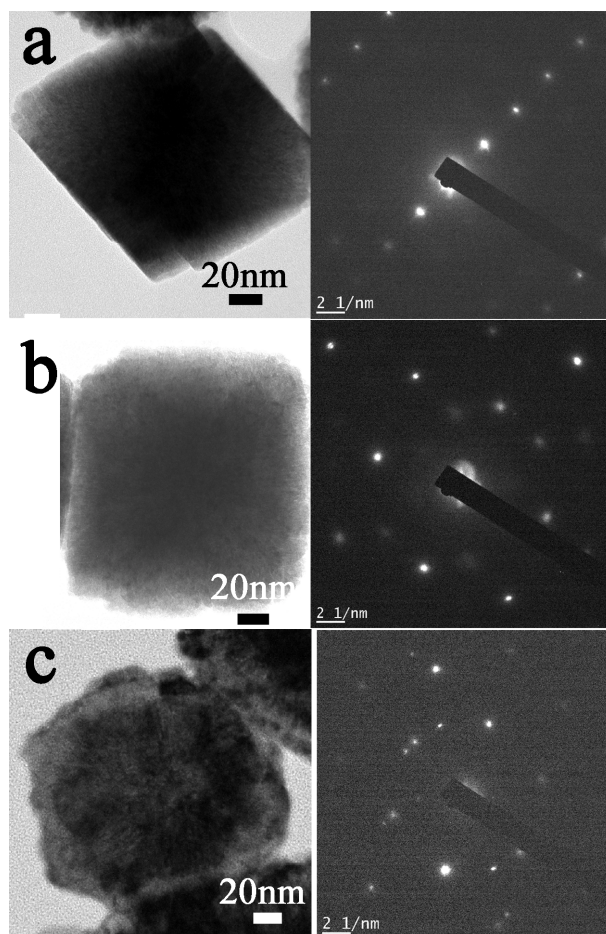

**Fig. S3** TEM images and corresponding SAED patterns of individual CeO<sub>2</sub> nanocrystal with the electron beams parallel to <110>, <100>, and <111>, respectively.

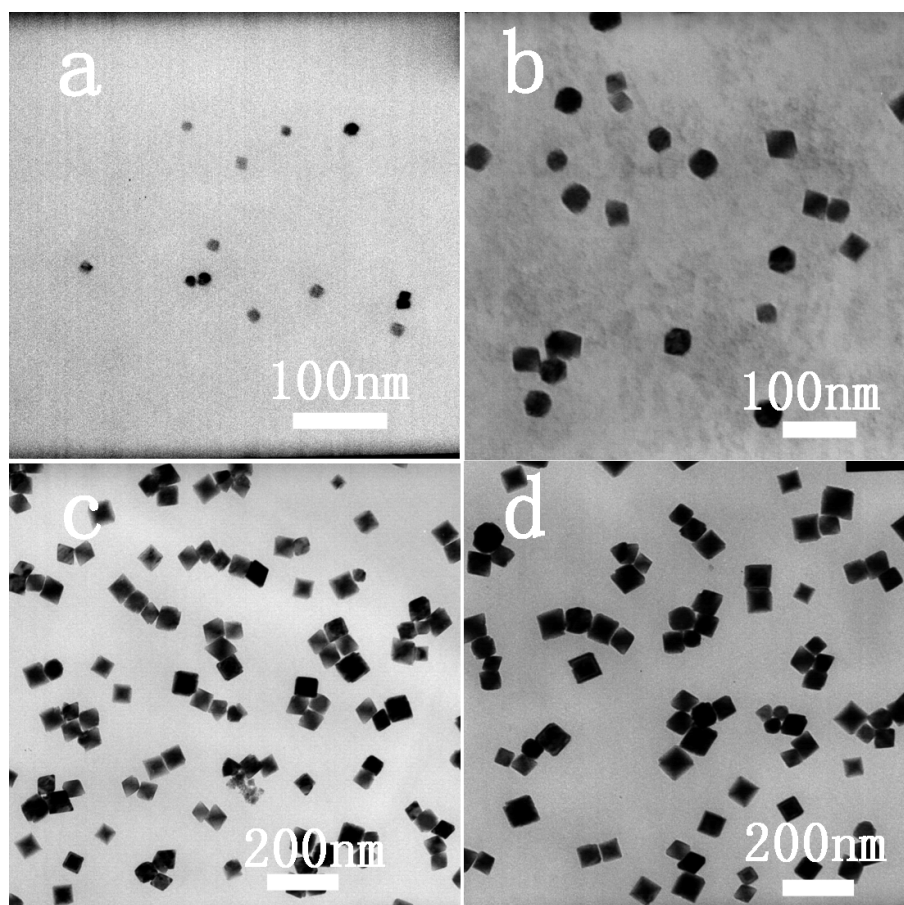

**Fig. S4** TEM images of particles obtained at 160° C at different reaction times: (a) 6h; (b) 12 h; (c) 18 h; (d) 24h with the  $\text{Ce}(\text{NO}_3)_3$  as the cerium precursor and the volume ratio between water and ethanol was 3:1 in the mixed solvent.

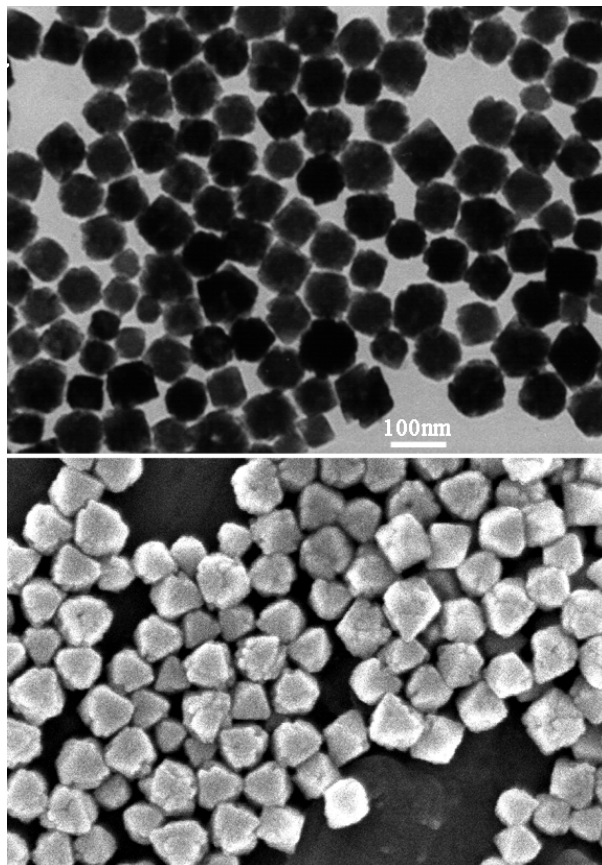

**Fig. S5** TEM/SEM images of the nanoparticles synthesized from  $(\text{NH}_4)_2\text{Ce}(\text{NO}_3)_6$  while keeping other experimental parameters constant.

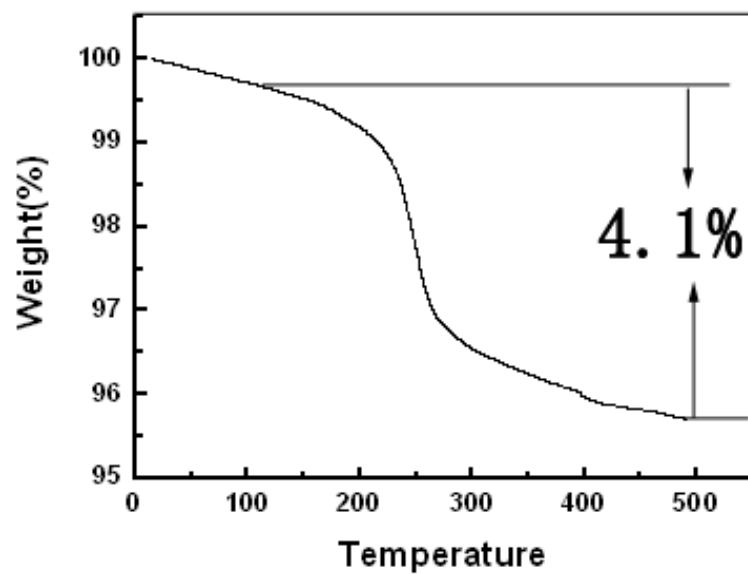

**Fig. S6** TG curve of as-obtained CeO<sub>2</sub> hollow nanocrystals.

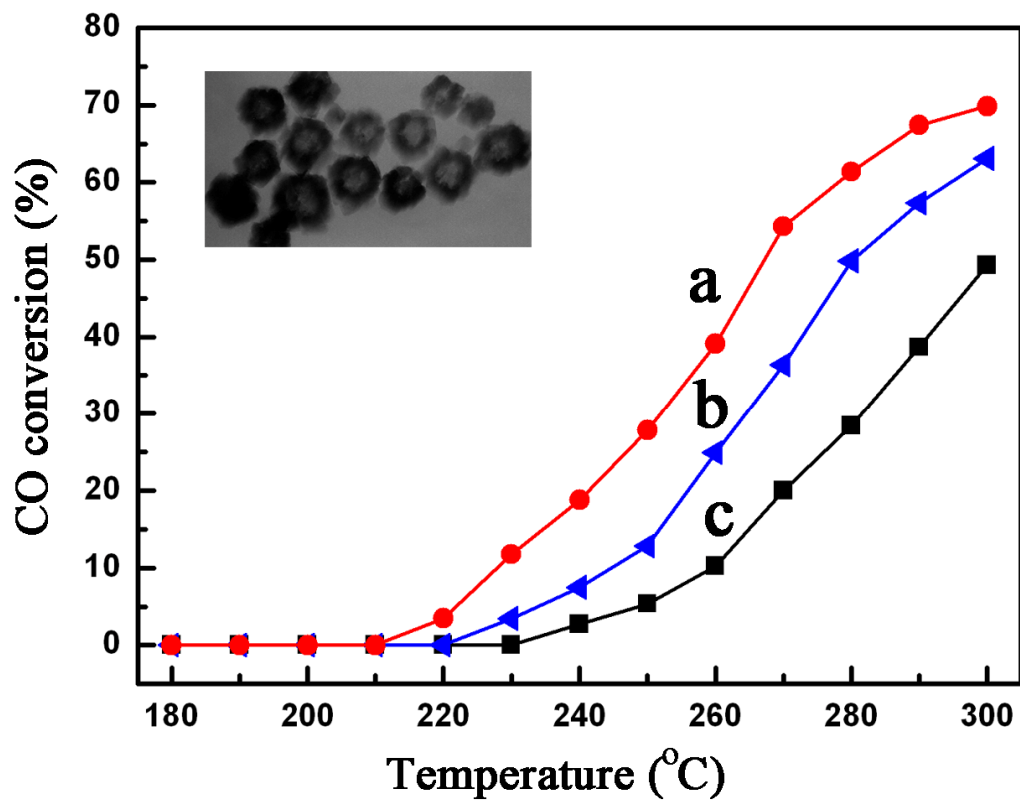

**Fig. 7** CO conversion profiles in the presence of CeO<sub>2</sub>: (a) the freshly prepared CeO<sub>2</sub> hollow nanocrystals; (b) the CeO<sub>2</sub> hollow nanocrystals after the first run catalysis evaluation; (c) the commercial CeO<sub>2</sub> powder. Inset is the TEM image of CeO<sub>2</sub> hollow nanocrystals after the first run catalysis evaluation.
